# Supplementary material for: Unveiling the stereoelectronic properties of a triphenylene-based tris N-heterocyclic carbene
Source: Royal Society of Chemistry journal article supplement (doi:10.1039/c3cc44109a), 2013-01-01
Supplement: c3cc44109a.pdf [file c3cc44109a.pdf]

## Supporting information for:

### Unveiling the stereoelectronic properties of a triphenylene-based tris-N-heterocyclic carbene

*Sergio Gonell, Roberto G. Alabau, Macarena Poyatos and Eduardo Peris*

|                                                                                      |               |
|--------------------------------------------------------------------------------------|---------------|
| <b>General methods</b>                                                               | <b>S1</b>     |
| <b>1. Synthesis and characterization of the metal complexes</b>                      | <b>S1</b>     |
| 1.1. Synthesis of complex <b>4</b>                                                   | S1            |
| 1.2. Synthesis of complex <b>5</b>                                                   | S2            |
| <b>2. Electrochemical measurements</b>                                               | <b>S2</b>     |
| <b>3. Spectra</b>                                                                    | <b>S3-S6</b>  |
| 3.1. <sup>1</sup> H and <sup>13</sup> C NMR spectra of <b>4</b>                      | S3            |
| 3.2. <sup>1</sup> H and <sup>13</sup> C NMR spectra of <b>5</b>                      | S4            |
| 3.3. High Resolution Mass Spectra of <b>4</b> and <b>5</b>                           | S5-S6         |
| <b>4. X-Ray Crystallography</b>                                                      | <b>S7</b>     |
| Table S1. Summary of crystal data, data collection, and structure refinement details |               |
| <b>5. Computational details</b>                                                      | <b>S8-S13</b> |
| <b>References</b>                                                                    | <b>S13</b>    |

**General methods.** The imidazolium-based salt **3**<sup>1</sup> and the metal complexes  $[\text{RhCl}(\text{COD})]_2$ ,<sup>2</sup>  $[\text{RhCl}(\text{CO})_2]_2$ ,<sup>3</sup> and  $[\text{RhCl}(\text{BimN}t\text{Bu}_2)(\text{COD})]_2$ <sup>4</sup> (BimNtBu = 1,3-di(*tert*-butyl)-benzimidazolylidene) were synthesized as previously reported. All operations were carried out by using standard Schlenk techniques under nitrogen atmosphere unless otherwise stated. Anhydrous solvents were dried using a solvent purification system (SPS M BRAUN) or purchased from Aldrich and degassed prior to use by purging with nitrogen and kept over molecular sieves. All other reagents were used as received from commercial suppliers. NMR spectra were recorded on a Varian Innova 300 and 500 MHz, using  $\text{CDCl}_3$  as solvent. Electrospray mass spectra (ESI-MS) were recorded on a Micromass Quatro LC instrument; nitrogen was employed as drying and nebulizing gas. Exact mass analysis was realized using Q-TOF premier mass spectrometer with electrospray source (Waters, Manchester, UK) operating at a resolution of ca. 16 000 (fwhm). Elemental analyses were carried out on a EuroEA3000 Eurovector Analyzer. Infrared spectra (FTIR) were obtained on a BrukerEQUINOX 55 spectrometer with a spectra window of 4000 - 600 $\text{cm}^{-1}$ .

## 1. Synthesis and characterization of the metal complexes

### 1.1. Synthesis of complex 4

KHMDS (0.5 M in toluene, 0.85 mL, 0.425 mmol, 3.15 equiv.) was added dropwise to a suspension of **3** (128.2 mg, 0.135 mmol) in THF (10 mL) at 0°C. After stirring at that temperature for 10 minutes, a solution of  $[\text{RhCl}(\text{COD})]_2$  (100 mg, 0.203 mmol) in THF (5 mL) was added *via* oven dried cannula. The resulting mixture was stirred for 10 minutes at 0°C and for 2 hours at 50°C. After this time, the volatile components were removed under vacuum. The crude solid was dissolved in  $\text{CH}_2\text{Cl}_2$  and purified by column chromatography. Flash chromatography using mixtures of  $\text{CH}_2\text{Cl}_2$ /acetone (from 95:5 to 7:3) afforded the separation of a yellow band that contained compound **4**. Compound **4** was obtained as a yellow solid after precipitation in a mixture of dichloromethane/hexanes. Yield: 81.4 mg (42 %). <sup>1</sup>H NMR (300 MHz,  $\text{CDCl}_3$ ):  $\delta$  8.74 (s, 6H,  $\text{CH}_{\text{arom}}$ ), 5.10 (brs, 6H,  $\text{CH}_{\text{COD}}$ ), 3.08 (brs, 6H,  $\text{CH}_{\text{COD}}$ ), 2.58 (s, 54H,  $\text{C}(\text{CH}_3)_3$ ), 2.50 (brs, 12H,  $\text{CH}_2_{\text{COD}}$ ), 1.78-1.86 (m, 12H,  $\text{CH}_2_{\text{COD}}$ ). <sup>13</sup>C NMR (75 MHz,  $\text{CDCl}_3$ ):  $\delta$  200.9 (d,  $^1J_{\text{Rh-C}} = 49.1$  Hz, Rh- $\text{C}_{\text{carbene}}$ ), 135.5 ( $\text{C}_{\text{q arom}}$ ), 124.0 ( $\text{C}_{\text{q arom}}$ ), 107.8 ( $\text{CH}_{\text{arom}}$ ), 94.4 (d,  $^1J_{\text{Rh-C}} = 15.8$  Hz, Rh- $\text{CH}_{\text{COD}}$ ), 67.9 (d,  $^1J_{\text{Rh-C}} = 15.8$  Hz, Rh- $\text{CH}_{\text{COD}}$ ), 60.9 ( $\text{C}(\text{CH}_3)_3$ ), 32.6 ( $\text{C}(\text{CH}_3)_3$ ), 32.4 ( $\text{CH}_2\text{-COD}$ ), 28.8 ( $\text{CH}_2\text{-COD}$ ). Electrospray MS (20 V,

$m/z$ ): 676.5  $[M-2Cl]^{2+}$ . HRMS ESI-TOF-MS (positive mode):  $[M-Cl]^+$  monoisotopic peak 1387.4236, calcd 1387.4238,  $\epsilon_r=0.14$  ppm. Anal. Calcd. for  $C_{69}H_{96}Cl_3N_6Rh_3$  (1424.60): C, 58.17; H, 6.79; N, 5.90. Found: C, 58.26; H, 7.05; N, 5.58.

## 1.2. Synthesis of complex 5

KHMDS (0.5 M in toluene, 0.54 mL, 0.27 mmol, 3.15 equiv.) was added dropwise to a suspension of **3** (81.5 mg, 0.086 mmol) in THF (10 mL) at 0°C. After stirring at that temperature for 10 minutes, a solution of  $[RhCl(CO)_2]_2$  (50 mg, 0.13 mmol) in THF (5 mL) was added *via* oven dried cannula. The resulting mixture was stirred for 10 minutes at 0°C and for 2 hours at 50°C. After this time, the volatile components were removed under vacuum. The crude solid was dissolved in  $CH_2Cl_2$  and filtered through a pad of Celite. Precipitation with a mixture  $CH_2Cl_2$ /hexane afforded compound **5** as a yellow solid. Yield: 27 mg (26 %).  $^1H$  NMR (500 MHz,  $CDCl_3$ ):  $\delta$  8.94 (s, 6H,  $CH_{arom}$ ), 2.58 (s, 54H,  $C(CH_3)_3$ ).  $^{13}C$  NMR (126 MHz,  $CDCl_3$ ):  $\delta$  187.5 (d,  $^1J_{Rh-C} = 42.4$  Hz, Rh- $C_{carbene}$ ), 185.8 (d,  $^1J_{Rh-C} = 57.2$  Hz, Rh-CO), 182.7 (d,  $^1J_{Rh-C} = 75.7$ , Rh-CO), 135.5 ( $C_q$  arom), 125.0 ( $C_q$  arom), 109.4 ( $CH_{arom}$ ), 61.3 ( $C(CH_3)_3$ ), 32.9 ( $C(CH_3)_3$ ). IR ( $CH_2Cl_2$ ) = 2078 ( $\nu_{C=O}$ ), 1999 ( $\nu_{C=O}$ )  $cm^{-1}$ . Electrospray MS (20 V,  $m/z$ ): 1073.2  $[M-(Rh(CO)_2Cl)+H]^+$ , 1216.1  $[M-2CO-Cl+MeCN]^+$ , 1285.2  $[M-2CO-Cl+2MeCN]^+$ . HRMS ESI-TOF-MS (positive mode):  $[M-Cl-2CO+MeCN]^+$  monoisotopic peak 1216.1488, calcd 1216.1483,  $\epsilon_r=0.4$  ppm. Slow decomposition of the compound prevented a correct elemental analysis.

## 2. Electrochemical measurements

The measurements were carried out using a GPES equipped PGSTAT-30 potentiostat from Autolab at room temperature. A three-electrode configuration was used, where two Pt microelectrodes were connected to the working electrode and counter electrode and a Ag wire was used as the pseudo-reference electrode. The redox potential of ferrocene (445 mV) was used to calibrate the potential scale. Measurements performed on 10 mM analyte in  $CH_2Cl_2$  with 0.1 mM  $[NBu_4]PF_6$ , at a  $100\text{ mVs}^{-1}$  scan rate.

### 3. Spectra

#### 3.1. $^1\text{H}$ and $^{13}\text{C}$ NMR spectra of **4**

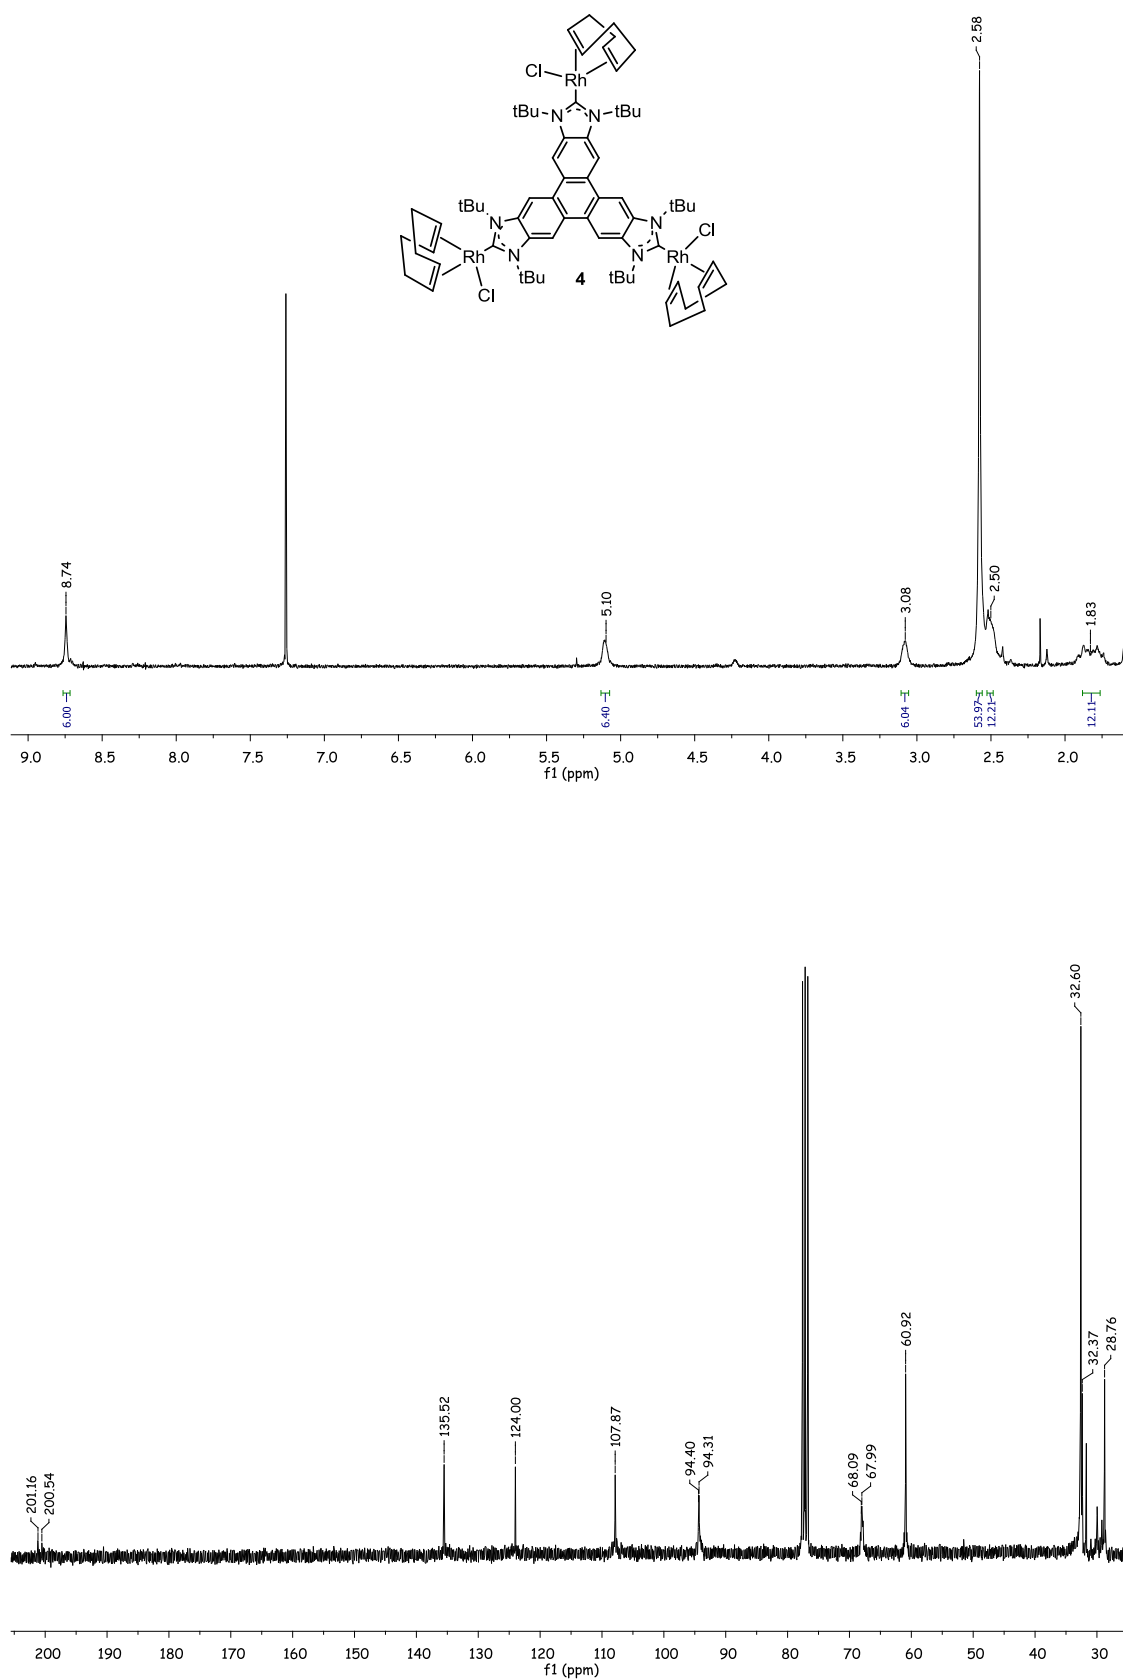

### 3.2. $^1\text{H}$ and $^{13}\text{C}$ NMR spectra of **5**

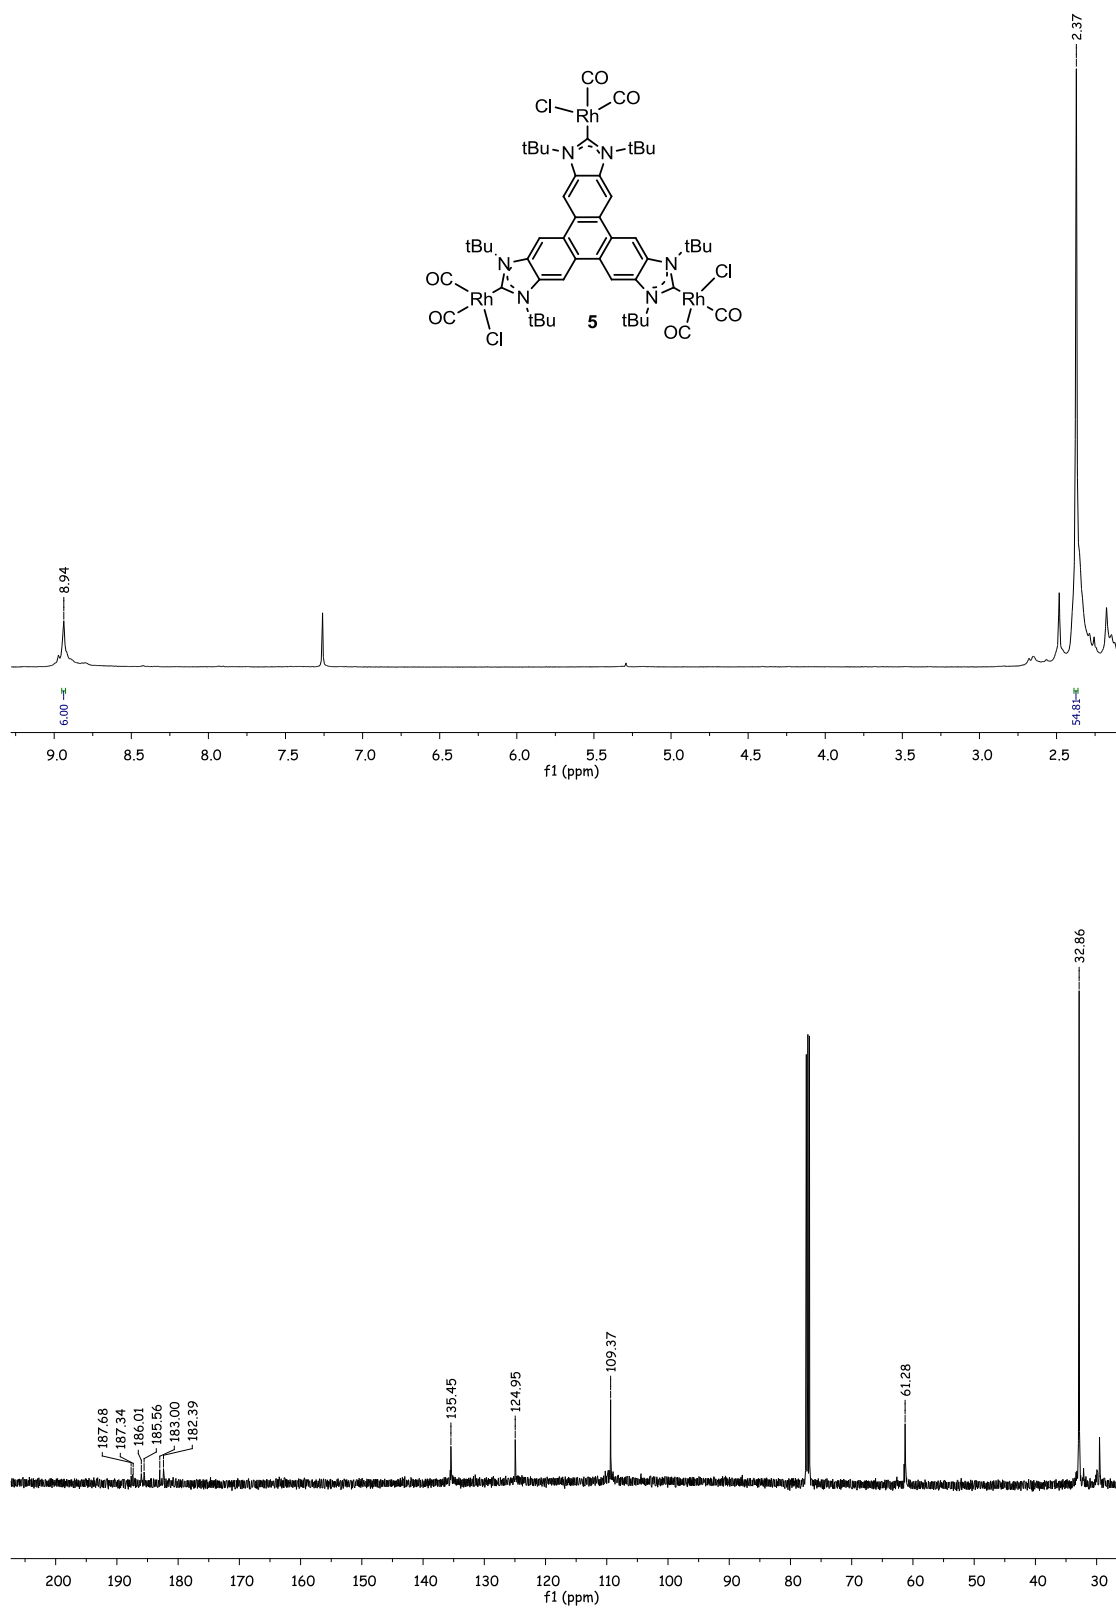

### 3.3. High Resolution Mass Spectra of 4 and 5

#### HR MS of 4

Rh-plano, 35 V

scic\_ep\_161 58 (0.627) Cm (53:81)

1: TOF MS ES+  
2.31e3

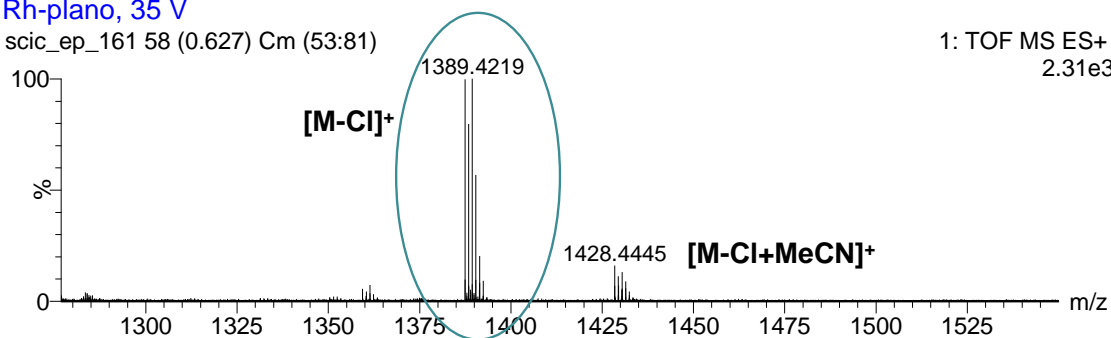

Rh-plano, 35 V

scic\_ep\_161 (0.016) Is (1.00,0.01) C<sub>69</sub>H<sub>96</sub>N<sub>6</sub>Rh<sub>3</sub>Cl<sub>2</sub>

1: TOF MS ES+  
2.58e12

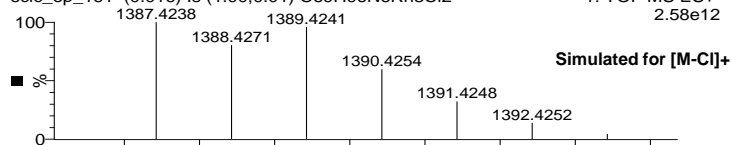

scic\_ep\_161 58 (0.627) Cm (53:81)

1: TOF MS ES+  
2.31e3

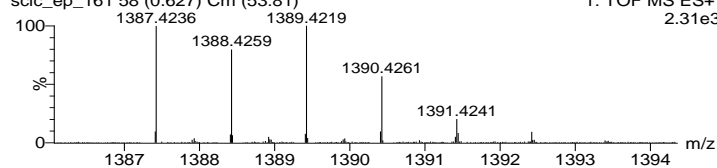

## HR MS of 5

### SG598, 25 V

scic\_ep\_162a 150 (1.615) Cm (121:152)

1: TOF MS ES+  
6.65e3

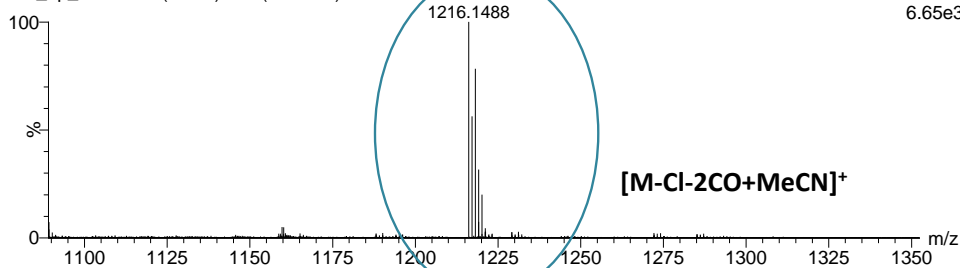

### SG598, 25 V

scic\_ep\_162a (0.016) Is (1.00,0.01) C<sub>49</sub>H<sub>60</sub>N<sub>6</sub>Rh<sub>3</sub>Cl<sub>2</sub>O<sub>4</sub>CH<sub>3</sub>CN

1: TOF MS ES+  
3.12e12

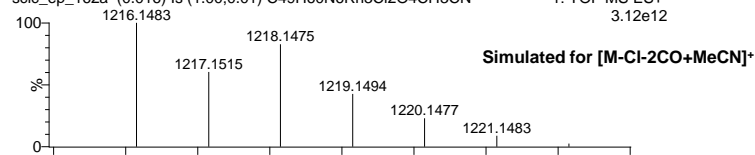

scic\_ep\_162a 150 (1.615) Cm (121:152)

1: TOF MS ES+  
6.65e3

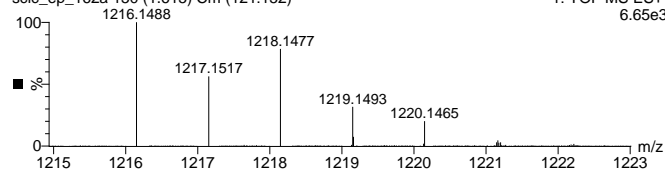

### SG598, 65 V

scic\_ep\_162b 41 (0.444) Cm (40:51)

1: TOF MS ES+  
4.94e3

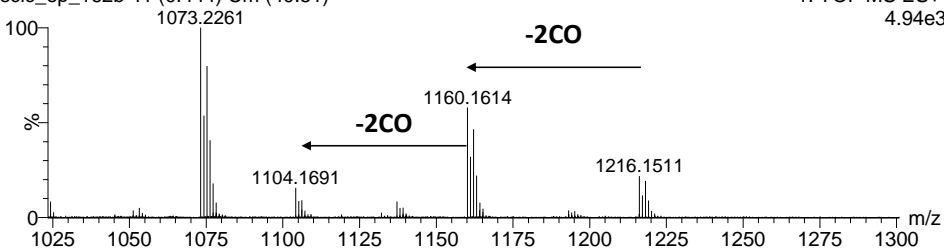

#### 4. X-Ray Crystallography

**X-Ray Diffraction studies for complex 4.** Crystals suitable for X-ray study of **4** were obtained by slow diffusion of diethyl ether into a concentrated solution of the complex in acetonitrile. Diffraction data was collected on a Agilent SuperNova diffractometer equipped with an Atlas CCD detector using Mo-K $\alpha$  radiation ( $\lambda = 0.71073 \text{ \AA}$ ). Single crystals were mounted on a MicroMount® polymer tip (MiteGen) in a random orientation. Absorption corrections based on the multiscan method were applied.<sup>5</sup> The structures were solved by direct methods in SHELXS-97 and refined by the full-matrix method based on  $F^2$  with the program SHELXL-97 using the OLEX software package.<sup>6</sup>

7

Key details of the crystal and structure refinement data are summarized in Supplementary Table S1. Further crystallographic details may be found in the respective CIF which was deposited at the Cambridge Crystallographic Data Centre, Cambridge, UK. The reference number for **4** was assigned as 936175.

**Supplementary Table S1.** Summary of crystal data, data collection, and structure refinement details.

| <b>4</b>                        |                                                                                                                                                      |
|---------------------------------|------------------------------------------------------------------------------------------------------------------------------------------------------|
| Empirical formula               | $C_{69}H_{96}Cl_3N_6Rh_3, (C_4H_6N_2)$                                                                                                               |
| Sum formula                     | $C_{73}H_{102}Cl_3N_8Rh_3$                                                                                                                           |
| Formula weight                  | 1506.71                                                                                                                                              |
| Temperature                     | 199.95(10)                                                                                                                                           |
| Crystal System                  | monoclinic                                                                                                                                           |
| Space group                     | C2/m                                                                                                                                                 |
| Unit cell dimensions            | $a = 16.9664(10) \text{ \AA}$ $\alpha = 90^\circ$<br>$b = 20.9747(7) \text{ \AA}$ $\beta = 107.965(6)$<br>$c = 21.9872(9) \text{ \AA}$ $\gamma = 90$ |
| Volume                          | 7443.0(6)                                                                                                                                            |
| Z                               | 2                                                                                                                                                    |
| Density (calculated)            | 1.345 mg/mm <sup>3</sup>                                                                                                                             |
| Absorption coefficient          | 6.644 m/mm <sup>-1</sup>                                                                                                                             |
| F(000)                          | 3128.0                                                                                                                                               |
| Crystal size                    | $0.13 \times 0.11 \times 0.09 \text{ mm}^3$                                                                                                          |
| Theta range for data collection | 6.92 to 146.44°                                                                                                                                      |
| Index ranges                    | $-20 \leq h \leq 20, -25 \leq k \leq 21, -27 \leq l \leq 26$                                                                                         |
| Reflections collected           | 34869                                                                                                                                                |
| Independent reflections         | 7563[R(int) = 0.0517]                                                                                                                                |
| Refinement method               | Full-matrix least-squares on $F^2$                                                                                                                   |
| Data / restraints / parameters  | 7563/20/416                                                                                                                                          |
| Goodness-of-fit on $F^2$        | 1.079                                                                                                                                                |
| Final R indices [I>2sigma(I)]   | $R_1 = 0.0711, wR_2 = 0.2116$                                                                                                                        |
| R indices (all data)            | $R_1 = 0.0948, wR_2 = 0.2281$                                                                                                                        |
| Largest diff. peak and hole     | 1.89 and $-0.60 \text{ e. \AA}^{-3}$                                                                                                                 |



## 5. Computational details

The DFT calculations presented in this work were carried out as reported in the literature for ditopic NHC complexes.<sup>8</sup> The calculated atomic coordinates are collected in Supplementary Tables S2, S3 and S4.

### Supplementary Table S2

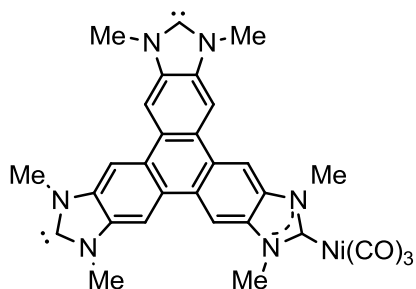

#### mono-Ni(CO)<sub>3</sub> complex, E = -3220.254582

|    |             |             |             |
|----|-------------|-------------|-------------|
| Ni | -6.82814200 | -3.77135000 | -0.04423800 |
| C  | -5.11770400 | -2.78136300 | 0.05112800  |
| C  | -6.65582300 | -5.08902300 | -1.25936200 |
| C  | -8.20929400 | -2.76742600 | -0.61687800 |
| C  | -7.17315300 | -4.40768500 | 1.60295900  |
| N  | -4.90581300 | -1.43439400 | 0.06390400  |
| N  | -3.86995200 | -3.33220600 | 0.07518800  |
| O  | -6.58397500 | -5.91181300 | -2.04764600 |
| O  | -9.12704400 | -2.20610400 | -1.00107600 |
| O  | -7.39423100 | -4.80339300 | 2.65035300  |
| C  | -3.55297300 | -1.13390500 | 0.06781900  |
| C  | -5.93637400 | -0.42261200 | 0.08193900  |
| C  | -2.88502200 | -2.35842700 | 0.07662000  |
| C  | -3.58062100 | -4.74708800 | 0.11291200  |
| C  | -2.85820800 | 0.05220600  | 0.06752400  |
| H  | -5.67974500 | 0.34518300  | 0.81391500  |
| H  | -6.05098300 | 0.03902100  | -0.90155800 |
| H  | -6.87242700 | -0.88846100 | 0.37314200  |
| C  | -1.51181200 | -2.41786300 | 0.08680600  |
| H  | -2.87101800 | -4.95644800 | 0.91585900  |
| H  | -3.16084100 | -5.08427300 | -0.83776400 |
| H  | -4.50626200 | -5.28107400 | 0.30762100  |
| C  | -1.45169900 | 0.02660900  | 0.07854600  |
| H  | -3.40042900 | 0.98553400  | 0.05395700  |
| C  | -0.77099900 | -1.22200900 | 0.08793400  |
| H  | -1.02222800 | -3.37999300 | 0.08955200  |

|   |             |             |             |
|---|-------------|-------------|-------------|
| C | -0.68964000 | 1.27612600  | 0.07905200  |
| C | 0.69203000  | -1.25854700 | 0.09601100  |
| C | -1.35544900 | 2.51618300  | 0.07180100  |
| C | 0.73104400  | 1.24020100  | 0.08802300  |
| C | 1.43163900  | -0.04502500 | 0.09572500  |
| C | 1.37334500  | -2.49013800 | 0.10367500  |
| C | -0.61987600 | 3.67726000  | 0.07320400  |
| H | -2.43381400 | 2.57437800  | 0.06522800  |
| C | 1.45656800  | 2.44618600  | 0.08964900  |
| C | 2.83833500  | -0.08875700 | 0.10286300  |
| C | 2.74774500  | -2.50110100 | 0.11068200  |
| H | 0.83772000  | -3.42789100 | 0.10375400  |
| N | -0.95984200 | 5.02105700  | 0.06762900  |
| C | 0.77901900  | 3.64218500  | 0.08213100  |
| H | 2.53637900  | 2.45004800  | 0.09689200  |
| C | 3.47630800  | -1.30633500 | 0.11023500  |
| H | 3.42677600  | 0.81666800  | 0.10233700  |
| N | 3.69288300  | -3.51501600 | 0.11862200  |
| C | 0.13389700  | 5.83413300  | 0.07245500  |
| C | -2.31425600 | 5.51976800  | 0.05762300  |
| N | 1.18565500  | 4.96712500  | 0.08136900  |
| N | 4.81016600  | -1.68255700 | 0.11794100  |
| C | 4.96890200  | -3.03635400 | 0.12320000  |
| C | 3.37805600  | -4.92362600 | 0.12148300  |
| H | -2.85729200 | 5.18667500  | 0.94579900  |
| H | -2.84622300 | 5.18092500  | -0.83504700 |
| H | -2.26326500 | 6.60572000  | 0.05446900  |
| C | 2.56343000  | 5.39733700  | 0.08892800  |
| C | 5.91840600  | -0.75777700 | 0.12004400  |
| H | 2.80032800  | -5.19062100 | 1.01009100  |
| H | 2.80851400  | -5.19605200 | -0.77074100 |
| H | 4.31836200  | -5.46923500 | 0.12748400  |
| H | 3.07774500  | 5.03696900  | 0.98348500  |
| H | 3.08894900  | 5.03234300  | -0.79720100 |
| H | 2.56692800  | 6.48448200  | 0.08612400  |
| H | 5.89117300  | -0.12119400 | 1.00809700  |
| H | 5.89966000  | -0.12733800 | -0.77259900 |
| H | 6.83393700  | -1.34401200 | 0.12642200  |

---

### Supplementary Table S3

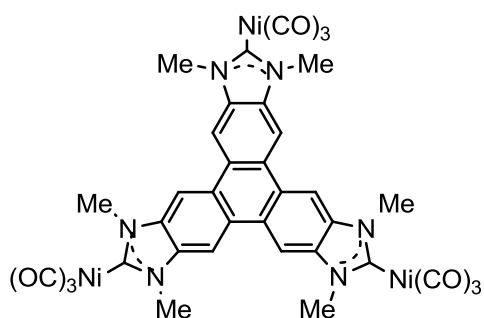

**tris-Ni(CO)<sub>3</sub> complex**, E = -6917.184023

|    |             |             |             |
|----|-------------|-------------|-------------|
| Ni | -6.80784000 | -3.76247800 | 0.01584300  |
| C  | -5.09847100 | -2.77593500 | 0.09511600  |
| C  | -6.64471200 | -5.10605000 | -1.17339300 |
| C  | -8.18260700 | -2.76151500 | -0.58068200 |
| C  | -7.16290400 | -4.36991500 | 1.67244500  |
| N  | -4.88706200 | -1.42797500 | 0.10299700  |
| N  | -3.84917900 | -3.32564700 | 0.11004900  |
| O  | -6.58078900 | -5.94503600 | -1.94458600 |
| O  | -9.09397000 | -2.20084500 | -0.97943500 |
| O  | -7.38996300 | -4.74792100 | 2.72468300  |
| C  | -3.53574700 | -1.12695900 | 0.09352700  |
| C  | -5.92002100 | -0.41801500 | 0.12897800  |
| C  | -2.86629700 | -2.35169600 | 0.09954600  |
| C  | -3.55959800 | -4.74093100 | 0.15002000  |
| C  | -2.84188100 | 0.05951100  | 0.08280500  |
| H  | -5.65417500 | 0.35575000  | 0.85119400  |
| H  | -6.05166800 | 0.03491200  | -0.85630100 |
| H  | -6.84991100 | -0.88427700 | 0.43884800  |
| C  | -1.49309700 | -2.40978200 | 0.09664400  |
| H  | -2.83523400 | -4.94593200 | 0.94069100  |
| H  | -3.15932900 | -5.08412100 | -0.80678300 |
| H  | -4.48174600 | -5.27263800 | 0.36619000  |
| C  | -1.43538700 | 0.03437100  | 0.08015200  |
| H  | -3.38602700 | 0.99168400  | 0.07087700  |
| C  | -0.75394600 | -1.21301100 | 0.08707200  |
| H  | -1.00381200 | -3.37201300 | 0.09673200  |
| C  | -0.67380500 | 1.28407800  | 0.06805400  |
| C  | 0.70910500  | -1.24763700 | 0.08134400  |
| C  | -1.34064400 | 2.52261200  | 0.06199600  |
| C  | 0.74722300  | 1.25049100  | 0.06027700  |

|    |             |             |             |
|----|-------------|-------------|-------------|
| C  | 1.44883500  | -0.03393500 | 0.06710000  |
| C  | 1.39072700  | -2.47809300 | 0.08736300  |
| C  | -0.60389600 | 3.68281500  | 0.04792200  |
| H  | -2.41860300 | 2.57991000  | 0.06365500  |
| C  | 1.47207300  | 2.45600600  | 0.04543100  |
| C  | 2.85493100  | -0.07562500 | 0.05910200  |
| C  | 2.76509300  | -2.48521600 | 0.07914700  |
| H  | 0.85630900  | -3.41597500 | 0.09391500  |
| N  | -0.95602000 | 5.02103500  | 0.04132100  |
| C  | 0.79147100  | 3.65017300  | 0.04021400  |
| H  | 2.55142800  | 2.46118800  | 0.03289500  |
| C  | 3.49180700  | -1.29366500 | 0.06612100  |
| H  | 3.44271500  | 0.82959000  | 0.04242600  |
| N  | 3.70066800  | -3.50470200 | 0.08349000  |
| C  | 0.14458200  | 5.82780000  | 0.01333700  |
| C  | -2.32631000 | 5.47857800  | 0.07820600  |
| N  | 1.20633700  | 4.97099400  | 0.03127500  |
| N  | 4.82738700  | -1.65845900 | 0.06588800  |
| C  | 4.97451900  | -3.01495700 | 0.05851900  |
| C  | 3.34429800  | -4.90455200 | 0.12695700  |
| Ni | 0.14894500  | 7.80007800  | -0.09329400 |
| H  | -2.86643800 | 4.95729100  | 0.87087800  |
| H  | -2.82331000 | 5.29965100  | -0.87805300 |
| H  | -2.32557700 | 6.54388800  | 0.29007800  |
| C  | 2.59734400  | 5.36150300  | 0.05125000  |
| C  | 5.90700700  | -0.69839200 | 0.08194300  |
| Ni | 6.63312100  | -4.08410000 | -0.03227600 |
| H  | 2.62350300  | -5.07625900 | 0.92878500  |
| H  | 2.91302300  | -5.22633900 | -0.82379200 |
| H  | 4.24335100  | -5.48006500 | 0.32769700  |
| C  | -1.11837600 | 8.32456000  | -1.26164200 |
| C  | 1.69389900  | 8.46957900  | -0.73567100 |
| C  | -0.16079300 | 8.43547700  | 1.56183500  |
| H  | 3.13551500  | 4.75302800  | 0.78002500  |
| H  | 3.05456200  | 5.23789100  | -0.93309000 |
| H  | 2.65826600  | 6.40353700  | 0.34907800  |
| H  | 5.68525500  | 0.08652600  | 0.80702900  |
| H  | 6.04998200  | -0.25141500 | -0.90447500 |
| H  | 6.81686300  | -1.20826200 | 0.38228400  |
| C  | 8.05893200  | -3.15017500 | -0.61750600 |

|   |             |             |             |
|---|-------------|-------------|-------------|
| C | 6.39926400  | -5.40384700 | -1.23619600 |
| C | 6.95719200  | -4.72600700 | 1.61774200  |
| O | -1.89023800 | 8.68663700  | -2.02053200 |
| O | 2.63000200  | 8.96299100  | -1.16477400 |
| O | -0.35092700 | 8.83613500  | 2.61300600  |
| O | 8.99985100  | -2.63512500 | -1.00915100 |
| O | 6.28958300  | -6.22925000 | -2.01681500 |
| O | 7.16533800  | -5.12552600 | 2.66593800  |

---

### Supplementary Table S4

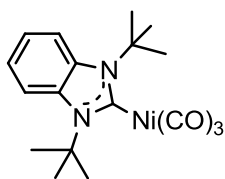

#### [Ni(CO)<sub>3</sub>(BimNtBu<sub>2</sub>)]

---

|     |         |        |         |
|-----|---------|--------|---------|
| C1  | 2.7770  | 4.9276 | 9.9669  |
| N2  | 1.8436  | 5.0739 | 8.9741  |
| N3  | 3.2790  | 6.1837 | 10.1879 |
| Ni4 | 3.9174  | 3.2013 | 10.1962 |
| C5  | 0.7365  | 4.1185 | 8.6464  |
| C6  | 1.9041  | 6.3575 | 8.4350  |
| C7  | 4.0078  | 6.6474 | 11.4125 |
| C8  | 2.8233  | 7.0681 | 9.2123  |
| C9  | 3.4287  | 2.2465 | 11.6456 |
| C10 | 3.8657  | 2.2013 | 8.6979  |
| C11 | 5.6748  | 3.5989 | 10.2293 |
| C12 | 0.5953  | 4.8759 | 8.7739  |
| C13 | 0.6632  | 2.9752 | 9.6536  |
| C14 | 0.9215  | 3.5583 | 7.2354  |
| C15 | 1.3094  | 6.9468 | 7.3195  |
| C16 | 4.0263  | 5.5744 | 12.4965 |
| C17 | 5.4390  | 7.0510 | 11.0549 |
| C18 | 3.2281  | 7.8313 | 12.0073 |
| C19 | 3.1646  | 8.3810 | 8.8884  |
| O20 | 3.1333  | 1.6289 | 12.5588 |
| O21 | 4.0013  | 1.4982 | 7.8067  |
| O22 | 6.8150  | 3.6717 | 10.1887 |
| H23 | -1.4137 | 4.1751 | 8.5998  |
| H24 | -0.7048 | 5.2794 | 9.7828  |

|     |         |        |         |
|-----|---------|--------|---------|
| H25 | -0.7071 | 5.6961 | 8.0691  |
| H26 | -0.2296 | 2.3888 | 9.4256  |
| H27 | 1.5261  | 2.3185 | 9.6101  |
| H28 | 0.5761  | 3.3524 | 10.6736 |
| H29 | 0.9454  | 4.3408 | 6.4769  |
| H30 | 1.8482  | 2.9911 | 7.1606  |
| H31 | 0.0931  | 2.8872 | 6.9979  |
| H32 | 0.6241  | 6.4073 | 6.6837  |
| C33 | 1.6471  | 8.2536 | 7.0078  |
| H34 | 4.4643  | 6.0168 | 13.3939 |
| H35 | 3.0166  | 5.2377 | 12.7364 |
| H36 | 4.6141  | 4.7051 | 12.2198 |
| H37 | 5.9969  | 6.2006 | 10.6656 |
| H38 | 5.4733  | 7.8444 | 10.3082 |
| H39 | 5.9508  | 7.4116 | 11.9499 |
| H40 | 2.2062  | 7.5285 | 12.2455 |
| H41 | 3.7141  | 8.1388 | 12.9349 |
| H42 | 3.1787  | 8.7006 | 11.3561 |
| H43 | 3.8976  | 8.9381 | 9.4518  |
| C44 | 2.5646  | 8.9629 | 7.7836  |
| H45 | 1.2047  | 8.7212 | 6.1367  |
| H46 | 2.8291  | 9.9770 | 7.5103  |

---

## References

1. S. Gonell, M. Poyatos and E. Peris, *Angew. Chem. Int. Edit. Engl.*, 2013, **52**, DOI: 10.1002/anie.201302686.
2. G. Giordano and R. H. Crabtree, *Inorg. Synth.*, 1990, **28**, 88.
3. F. Malbosc, V. Chauby, C. Serra-Le Berre, M. Etienne, J. C. Daran and P. Kalck, *Eur. J. Inorg. Chem.*, 2001, 2689.
4. J. A. V. Er, A. G. Tennyson, J. W. Kamplain, V. M. Lynch and C. W. Bielawski, *Eur. J. Inorg. Chem.*, 2009, 1729.
5. R. C. Clark and J. S. Reid, *Acta Crystallogr. Sect. A*, 1995, **51**, 887.
6. O. V. Dolomanov, L. J. Bourhis, R. J. Gildea, J. A. K. Howard and H. Puschmann, *J. Appl. Crystallogr.*, 2009, **42**, 339.
7. G. M. Sheldrick, *Acta Crystallogr. Sect. A*, 2008, **64**, 112.
8. D. G. Gusev and E. Peris, *Dalton Trans.*, 2013, **42**, 7359.
